# Supplementary material for: The effect of audiovisual feedback of monitor/defibrillators on percentage of appropriate compression depth and rate during cardiopulmonary resuscitation
Source: PubMed Central journal article supplement (PMC10552289; doi:10.1186/s12871-023-02304-9), 2023-10-05
Supplement: 12871_2023_2304_MOESM2_ESM.pdf [file 12871_2023_2304_MOESM2_ESM.pdf]

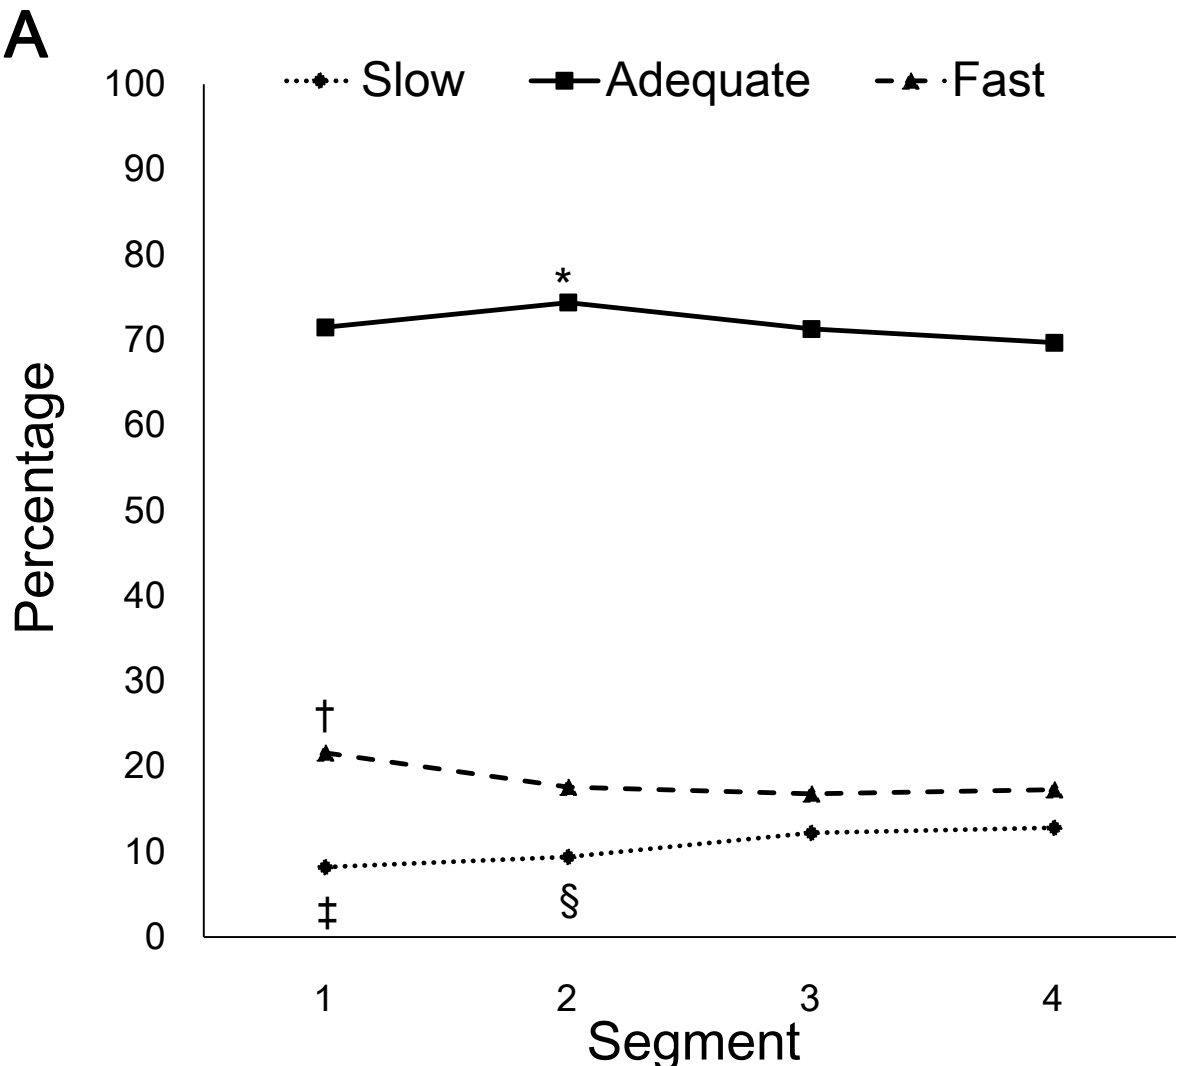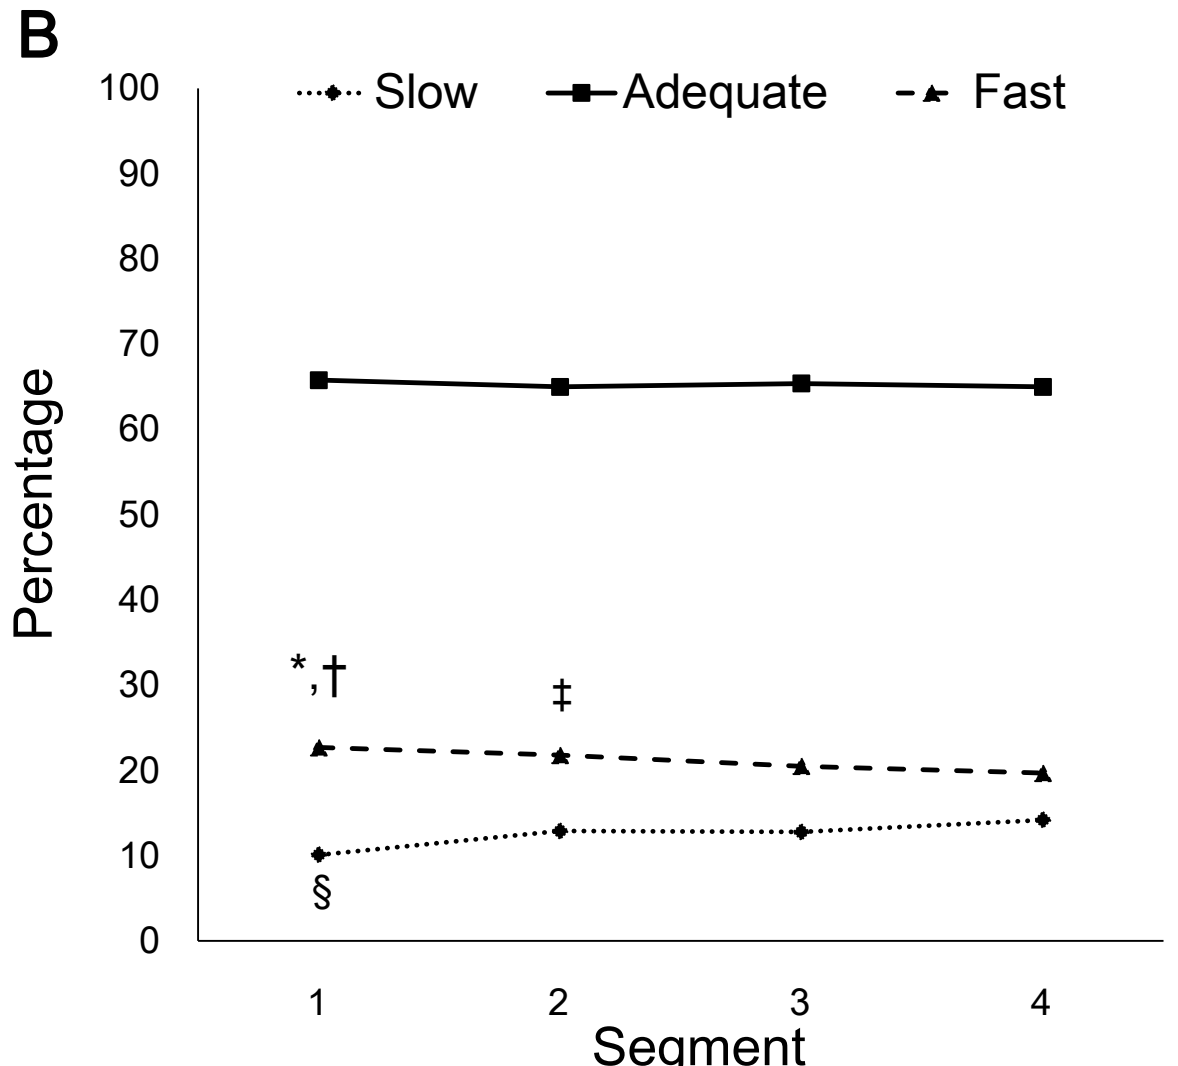

Supplemental figure 2. Percentage of rate groups per segment within a single cycle. . A: no-feedback period, B: feedback period

A. \*  $P < 0.001$  compared with segment 1, 2, and 3, †  $P < 0.001$  compared with segment 3 and 4. B. \*  $P < 0.001$  compared with segment 2, 3, and 4, †  $P < 0.001$  compared with segment 3 and 4.
