# Supplementary material for: The effect of audiovisual feedback of monitor/defibrillators on percentage of appropriate compression depth and rate during cardiopulmonary resuscitation
Source: PubMed Central journal article supplement (PMC10552289; doi:10.1186/s12871-023-02304-9), 2023-10-05
Supplement: 12871_2023_2304_MOESM3_ESM.pdf [file 12871_2023_2304_MOESM3_ESM.pdf]

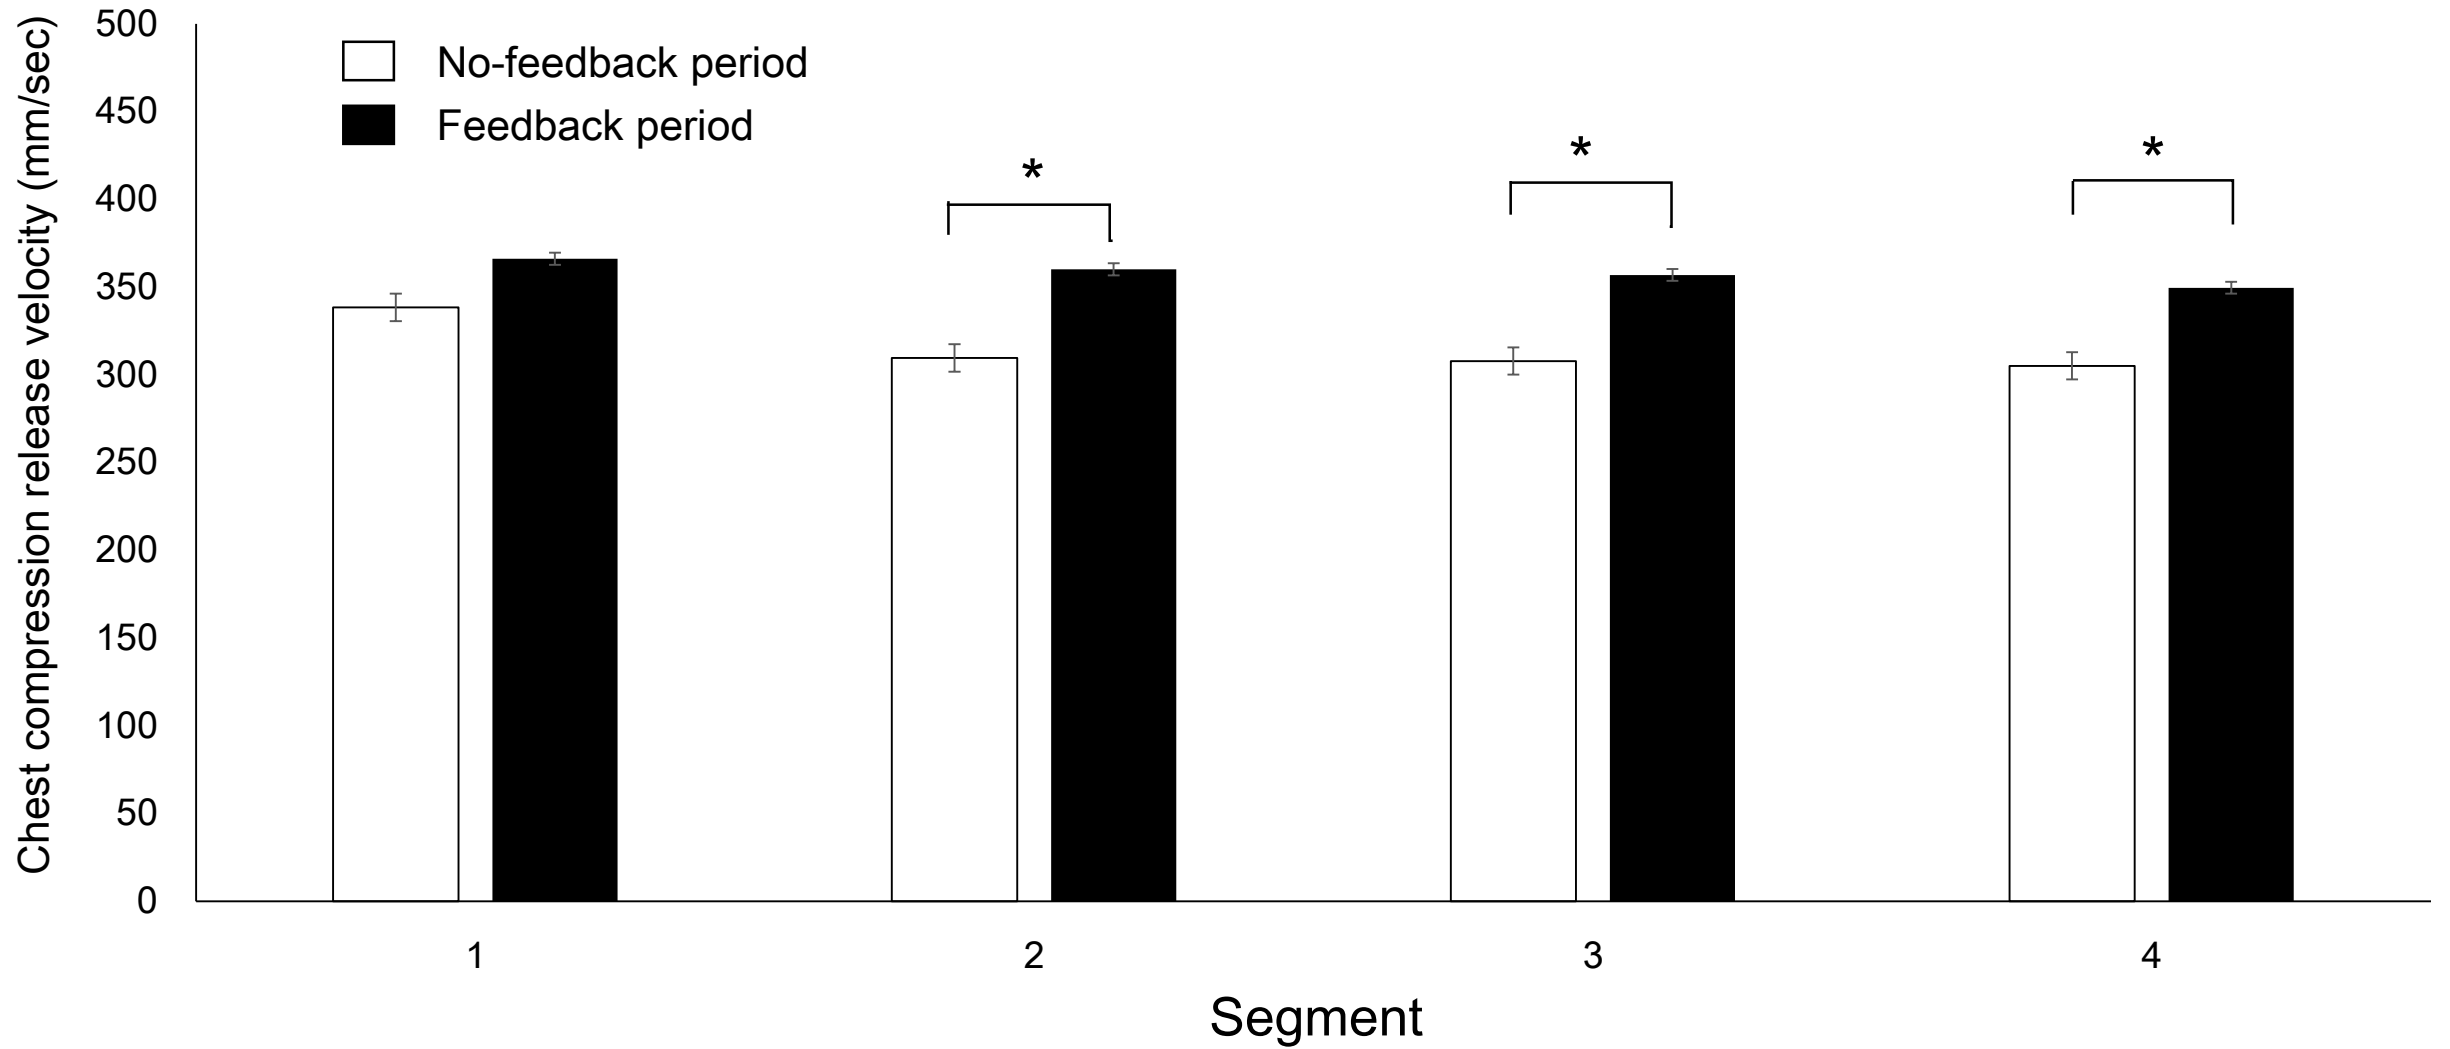

Supplemental figure 3. Mean chest compression release velocity between the two groups within a single cycle.

White bar represents CCRV in the no-feedback period, black bar represents CCRV in the feedback period, \*  $P < 0.05$ . CCRV, chest compression release velocity.
